# Supplementary material for: Tamoxifen Metabolism and Efficacy in Breast Cancer: A Prospective Multicenter Trial
Source: Oxford University Press journal article supplement (doi:10.1158/1078-0432.ccr-17-3028), 2018-02-19
Supplement: 10780432ccr173028-sup-190638_2_supp_4506760_p2l8pq.docx [file 10780432ccr173028-sup-190638_2_supp_4506760_p2l8pq.docx]

**Supplementary Figures**

**Supplementary Figure S2.** Flowchart of patients who were included/excluded from the study.

Endoxifen Analysed (n=247)

Analysed for primary and main secondary endpoint (n=209)

Initial recruitment (n=309)

Enrollment (n=297)

Exclusion (n=12)

Not meeting inclusion criteria

No target lesions (n=38)

No serum material(n=50). Serum sampling was non-compliant with protocol
