# Supplementary material for: Tamoxifen Metabolism and Efficacy in Breast Cancer: A Prospective Multicenter Trial
Source: Oxford University Press journal article supplement (doi:10.1158/1078-0432.ccr-17-3028), 2018-02-19
Supplement: 10780432ccr173028-sup-190638_2_supp_4506761_p2l8pq.docx [file 10780432ccr173028-sup-190638_2_supp_4506761_p2l8pq.docx]

**Supplementary Tables**

**Supplementary Table S2**. Results of ordinal regression models of the questionnaire items on endoxifen level after multiple imputation. Symptoms are modelled as three-level ordinal variables (score 1, 2, >2).

| **QOL symptom** | **Presence of symptom, baseline** | **Presence of symptom,**  **3 months** | **OR per µg/l increase in endoxifen** | **95% CI** | **p-value** |
| --- | --- | --- | --- | --- | --- |
| Hot flashes, day | 28% | 53% | 0.99 | 0.96-1.03 | 0.73 |
| Hot flashes, night | 25% | 43% | 1.02 | 0.99-1.06 | 0.22 |
| Vaginal dryness | 18% | 17% | 0.94 | 0.89-1.00 | 0.04 |
| Urinary problems | 21% | 23% | 0.98 | 0.94-1.04 | 0.55 |
| Memory problems | 23% | 30% | 1.02 | 0.97-1.06 | 0.48 |
| Joint/muscle pain | 61% | 58% | 0.98 | 0.95-1.01 | 0.26 |
| Sexual problems | 9% | 9% | 0.94 | 0.85-1.04 | 0.22 |
| Sleeping problems | 41% | 36% | 1.00 | 0.96-1.04 | 0.92 |

QOL: quality of life; OR: odds ratio
