# Supplementary material for: Tamoxifen Metabolism and Efficacy in Breast Cancer: A Prospective Multicenter Trial
Source: Oxford University Press journal article supplement (doi:10.1158/1078-0432.ccr-17-3028), 2018-02-19
Supplement: 10780432ccr173028-sup-190638_2_supp_4506762_p2l8pq.docx [file 10780432ccr173028-sup-190638_2_supp_4506762_p2l8pq.docx]

**Supplementary Tables**

**Supplementary Table S1.** List of participating centres and number of patients included.

| **Center** | **Number of patients** |
| --- | --- |
| University Hospitals Leuven, Belgium | 194 |
| Cantonal Hospital, St. Gallen, Switzerland | 21 |
| AZ St-Blasius, Dendermonde, Belgium | 20 |
| AZ Klina, Brasschaat, Belgium | 13 |
| AZ St-Maarten, Duffel, Belgium | 12 |
| Imelda Ziekenhuis, Bonheiden, Belgium | 11 |
| AZ Maria-Middelares, Gent, Belgium | 6 |
| Clinique et Maternité Sainte-Elisabeth, Namur, Belgium | 6 |
| AZ Nikolaas, St. Niklaas, Belgium | 4 |
| Jessa Ziekenhuis, Hasselt, Belgium | 3 |
| University Hospitals Ghent, Belgium | 2 |
| Grand Hôpital de Charleroi, Belgium | 2 |
| AZ Heilig-Hart, Roeselare, Belgium | 1 |
| Ziekenhuis Oost-Limburg, Genk, Belgium | 1 |
| University Hospital Zurich, Switzerland | 1 |
| Total | 297 |

AZ, Algemeen Ziekenhuis (General Hospital).
